# Supplementary material for: Short latency afferent inhibition differs with load type during isometric finger abduction
Source: Research Square preprint supplement (doi:10.21203/rs.3.rs-7691656/v1), 2025-10-17
Supplement: Supplementary file 1 [file d8446dbe92e9f1db7efd483d.xlsx]

## Sheet: Pre_BEMG Reliability
Subject	MVC			BEMG (mV)				BEMG (%MVC)				Absolute error rate (%)
	kgf	Nm	EMG (mV)	Force	Force+ES	Position	Position+ES	Force	Force+ES	Position	Position+ES	Force	Force+ES	Position	Position+ES
A	1	0.735	1.04935	0.086298	0.0912	0.084626	0.0925	8.22393	8.69108	8.0646	8.81496	2.4	1.565	1.2654	0.6988
B	1.5	1.1025	0.693036	0.06013	0.04987	0.06979	0.06321	8.67632	7.19587	10.0702	9.12074	2.48235	0.905882	2.741	2.4796
C	1.06	0.7791	0.989198	0.1603	0.18642	0.1512	0.1897	16.205	18.8456	15.2851	19.1772	1.66	3.21	1.819	3.4788
D	0.75	0.55125	0.81213	0.06111	0.0745	0.05894	0.06024	7.52466	9.17341	7.25746	7.41753	0.866667	1.22	3.395	2.5238
E	1.6	1.176	1.31238	0.1036	0.1247	0.09863	0.1098	7.89406	9.50182	7.51535	8.36648	0.586667	2.24	1.0424	0.4748
F	1.2	0.882	0.682962	0.11333	0.1258	0.11515	0.12871	16.5939	18.4198	16.8604	18.8459	1.67143	1.61429	0.8654	1.0626
G	2	1.47	1.61322	0.12593	0.12607	0.11837	0.10574	7.80613	7.81481	7.3375	6.55459	3.22	2.62667	1.45	0.8409
H	1.6	1.176	1.0474	0.05691	0.05198	0.06713	0.0524	5.43348	4.96278	6.40923	5.00288	3.32	2.62667	1.45	0.8409
I	1.7	1.2495	1.38	0.08813	0.09157	0.07791	0.0894	6.38623	6.63551	5.64565	6.47826	3.05333	3.14667	0.7857	1.3607
J	0.78	0.5733	0.964758	0.1253	0.1298	0.12559	0.1297	12.9877	13.4542	13.0178	13.4438	2.09	2.66	1.0016	1.4587
K	1.51	1.10985	0.89	0.0780374	0.082775	0.0897917	0.0895893	8.76824	9.30056	10.089	10.0662	0.970552	1.70389	1.25259	1.70514
L	1.05	0.77175	0.604	0.0760126	0.080116	0.0603064	0.0635182	12.5849	13.2642	9.9845	10.5163	2.96212	3.1322	1.01752	1.28424
M	1.18	0.8673	0.25	0.0417	0.0407	0.041	0.042	16.68	16.28	16.4	16.8	0.867898	1.35907	0.588269	1.82833
N	0.86	0.6321	0.79	0.07517	0.07382	0.0742	0.0746401	9.51519	9.3443	9.39241	9.44811	1.78379	1.63403	2.88578	1.84834
O	2.08	1.5288	0.63	0.0627171	0.06109	0.06263	0.0640952	9.95509	9.69683	9.94127	10.1738	2.91992	1.83755	1.72782	1.54813
P	1.21	0.88935	0.61774	0.13794	0.1474	0.1368	0.148746	22.3298	23.8612	22.1452	24.079	1.66837	1.37794	1.47731	1.76517
mean	1.3175	0.968363	0.895386	0.0907884	0.0961132	0.089504	0.0939993	11.0978	11.6526	10.9635	11.5191	2.03269	2.05374	1.5478	1.57493
SD	0.410423	0.301661	0.340346	0.0336369	0.0402844	0.0316891	0.039821	4.69683	5.24457	4.57885	5.43587	0.912855	0.751997	0.805198	0.774519

## Sheet: BEMG_SAI
BEMG_SAI (mV)																	N20 latency (msec)
Subject	Force								Position
	Pre	1 st	2 nd	3 rd	4 th	5 th	mean	SD	Pre	1 st	2 nd	3 rd	4 th	5 th	mean	SD
A	0.0705	0.0605	0.0698	0.0564	0.0721	0.0532	0.06375	0.0080966	0.0672	0.0564	0.0721	0.0532	0.0686	0.056	0.06225	0.00796285	19
B	0.0575	0.0751	0.052	0.0612	0.0639	0.0578	0.06125	0.00787877	0.0622	0.078	0.0651	0.0598	0.0541	0.0641	0.0638833	0.0079502	22
C	0.0679	0.0769	0.0828	0.0788	0.0795	0.083	0.07815	0.00555005	0.0715	0.0924	0.1103	0.0654	0.0782	0.0711	0.0814833	0.0168909	19
D	0.048	0.046	0.0478	0.0489	0.054	0.055	0.04995	0.00366156	0.0447	0.0543	0.0454	0.0493	0.0478	0.0506	0.0486833	0.00355045	21
E	0.0431	0.0372	0.0436	0.0449	0.0487	0.0474	0.04415	0.00403819	0.0519	0.0487	0.0546	0.0621	0.055	0.0545	0.0544667	0.00443652	20
F	0.1081	0.1098	0.1125	0.1084	0.0989	0.103	0.106783	0.00495153	0.1095	0.0934	0.096	0.1106	0.105	0.1203	0.1058	0.00997417	24
G	0.1073	0.1095	0.0947	0.148	0.1209	0.1312	0.1186	0.0190269	0.1256	0.1246	0.0896	0.1502	0.1336	0.1273	0.12515	0.0198385	18
H	0.1044	0.1084	0.1373	0.092	0.1084	0.1034	0.108983	0.0151204	0.0996	0.1032	0.1041	0.1292	0.0986	0.1271	0.1103	0.0139977	17
I	0.0741	0.0736	0.0797	0.0717	0.0883	0.097	0.0807333	0.00999413	0.0899	0.0859	0.0833	0.0809	0.0766	0.087	0.0839333	0.00473821	19
J	0.1164	0.0979	0.0921	0.179	0.0977	0.112	0.11585	0.0323071	0.1199	0.1462	0.1129	0.1427	0.1077	0.1123	0.123617	0.0166388	18
K	0.0854	0.0815	0.0829	0.0954	0.0858	0.0824	0.0855667	0.0051079	0.0872	0.0833	0.0729	0.078	0.0743	0.0792	0.07915	0.0054025	23
L	0.08752	0.09794	0.05604	0.10864	0.12306	0.11752	0.0984533	0.0244601	0.06186	0.06462	0.0798	0.0669	0.0863	0.0856	0.07418	0.0110006	19.1
M	0.0386	0.0411	0.0513	0.051	0.0464	0.048	0.0460667	0.00521523	0.0268	0.0412	0.0538	0.0714	0.0442	0.0621	0.0499167	0.0159254	18.9
N	0.0691	0.061	0.0838	0.0718	0.0707	0.0635	0.0699833	0.00797782	0.0728	0.0642	0.0737	0.0731	0.0707	0.0694	0.07065	0.00355232	18.5
O	0.1091	0.0913	0.0917	0.1014	0.0854	0.082	0.0934833	0.0101164	0.1059	0.1156	0.1013	0.1067	0.0868	0.0763	0.0987667	0.0145021	19.9
P	0.1015	0.1255	0.1131	0.1292	0.1382	0.1601	0.127933	0.0203292	0.1206	0.11	0.1198	0.1103	0.1305	0.1367	0.121317	0.0107073	19.3
Mean							0.0843554								0.0845967		19.7312
SD							0.0270057								0.026455		1.89058

## Sheet: MEP_SAI
FDI MEP _All Tasks (mV)
subject	Rest			Force			Position
	Single	ISI=N20+2 msec	Ratio	Single	ISI=N20+2 msec	Ratio	Single	ISI=N20+2 msec	Ratio
A	1.653	0.33	0.8	1.075	1.01	0.06	1.335	1.18	0.116
B	0.734	0.333	0.546	1.335	0.553	0.586	1.358	0.806	0.406
C	1.096	0.71	0.352	1.323	0.446	0.663	1.193	0.738	0.382
D	1.306	0.238	0.818	1.079	0.225	0.791	1.027	0.429	0.582
E	1.113	0.573	0.486	2.042	1.32	0.354	1.902	1.673	0.121
F	0.93	0.585	0.371	0.94	0.35	0.628	0.96	0.43	0.552
G	0.843	0.141	0.832	1.24	0.635	0.488	1.1	0.715	0.35
H	0.922	0.308	0.666	0.955	0.605	0.366	0.71	0.655	0.077
I	1.669	0.795	0.524	1.43	1.065	0.255	1.255	1.21	0.036
J	1.248	0.56	0.551	1.359	0.764	0.438	1.118	1.363	-0.22
K	1.03	0.3	0.709	1.29	0.62	0.519	0.93	0.33	0.645
L	0.702	0.329	0.531339	0.894	0.437	0.511186	0.65	0.481	0.26
M	0.59	0.31	0.474576	0.83	0.67	0.192771	0.76	0.73	0.0394737
N	1.22	0.61	0.5	2.56	1.88	0.265625	2.45	2.08	0.15102
O	1.38	0.5	0.637681	1.63	1.14	0.300613	1.85	1.78	0.0378378
P	1.09	0.34	0.688073	1.06	1.1	-0.0377358	1.11	1.02	0.0810811
mean	1.09537	0.435125	0.592917	1.31512	0.80125	0.398779	1.23175	0.97625	0.226026
SD	0.313118	0.185141	0.149318	0.451713	0.426127	0.223115	0.478149	0.527637	0.239305

## Sheet: SLRs&LLRs
Heteronymous reflex (mV)
Subject	Force			Position
	BEMG	SLR(peak)	LLR(peak)	BEMG	SLR(peak)	LLR(peak)
A	0.126	0.224	0.153	0.139	0.285	0.179
B	0.124	0.186	0.162	0.103	0.147	0.145
C	0.045	0.093	0.05	0.05	0.122	0.066
D	0.111	0.178	0.195	0.106	0.179	0.178
E	0.058	0.106	0.064	0.062	0.149	0.084
F	0.048	0.113	0.057	0.049	0.116	0.063
G	0.086	0.138	0.145	0.077	0.167	0.146
H	0.091	0.179	0.127	0.082	0.205	0.134
I	0.122	0.192	0.128	0.113	0.189	0.143
J	0.127	0.201	0.19	0.131	0.218	0.245
K	0.127	0.22	0.121	0.18	0.342	0.199
L	0.0941496	0.134	0.13	0.086856	0.1248	0.1248
M	0.0490873	0.0711873	0.0576873	0.0501199	0.0880639	0.0497065
N	0.0862467	0.239923	0.118317	0.0818368	0.217421	0.149672
O	0.0798384	0.119256	0.117296	0.0783718	0.0973284	0.120521
P	0.152445	0.599336	0.173857	0.165129	0.658574	0.222024
mean	0.0954229	0.187106	0.124322	0.0971446	0.206574	0.140545
SD	0.0333889	0.121032	0.0467024	0.0400531	0.138219	0.0563904
